# Supplementary material for: Overwintering Strategy and Mechanisms of Cold Tolerance in the Codling Moth (Cydia pomonella)
Source: PLoS One. 2013 Apr 17;8(4):e61745. doi: 10.1371/journal.pone.0061745 (PMC3629207; doi:10.1371/journal.pone.0061745)
Supplement: Dataset S1 — Concentrations of metabolites in hemolymph and tissues of field-sampled caterpillars of Cydia pomonella . (XLSX) [file pone.0061745.s001.xlsx]

## Sheet: List1
Dataset S1: Concentrations of metabolites in hemolymph and tissues of field-collected caterpillars of Cydia pomonella during 2010/2011.
		(all concentrations are expressed in mM in the respective tissue water content)
Hemolymph		Organic acids						Amino acids																												Polyamines			Free fatty acids										Sugars and polyols
	No. in PCA:	1	2	3	4	5		6	7	8	9	10	11	12	13	14	15	16	17	18	19	20	21	22	23	24	25				26	27	28	29	30	31	32		33	34	35	36	37	38	39	40	41		42
Sampling date		Pyruvate	Succinate	Lactate	Glutarate	Citrate		Ala	Gly	ABU	Val	Leu	Ile	Thr	Ser	Pro	Glu	Gln	Arg	Asn	Asp	Met	Phe	Cys	Hcy	Orn	Lys	His	Tyr	Trp	His	Tyr	Trp	CTH	CC	Putrescine	Cadaverine		FA C16:0	FA C17:0	FA C18:0	FA C18:1n9	FA C18:2n6	FA C18:3n3	FA C19:0	FA C20:2n6	FA C20:3n6		Glycerol
Jul 2010	mean	0.104624	1.68005	0.369025	0.422243	8.22878		2.55981	1.00379	0.15954	1.92557	0.715352	0.706066	3.65887	7.29203	12.7981	0.406329	11.9325	1.28578	0.146176	0.0466664	0.448886	0.860209	0.122901	0.175979	0.0709301	3.4158	4.56124	4.67535	0.789227	4.56124	4.67535	0.789227	0.250315	0.110461	18.8245	0.10523		0.61131	0.292764	0.452179	0.718264	0.46068	0.373833	0.361927	0.0941841	0.374904		0.648219
	S.D.	0.0248804	0.250703	0.155273	0.116476	0.956439		0.298011	0.260619	0.0254519	0.175947	0.0600483	0.0353239	0.682096	2.45359	2.04278	0.0635509	3.45551	0.259731	0.0311331	0.00525869	0.104827	0.0433112	0.0206728	0.0299496	0.0160864	0.832434	0.265149	0.847559	0.0631874	0.265149	0.847559	0.0631874	0.0221458	0.0461224	3.18512	0.0214227		0.151199	0.0509592	0.188565	0.34412	0.113437	0.0733848	0.0613239	0.133196	0.0644417		0.147611
Sep 2010	mean	0.0727992	1.0938	0.265728	0.785417	7.94532		11.255	2.48889	0.161753	2.78036	1.04432	1.01848	1.73439	15.4555	28.2628	0.499079	21.8835	1.84543	0.112693	0.0448161	0.214887	1.11824	0.0811418	0.112431	0.0782368	8.91449	3.50598	4.17379	0.538271	3.50598	4.17379	0.538271	0.32682	0.0933745	4.19843	0.0264227		0.570039	0.182046	0.321057	0.529513	0.49551	0.241067	0.225614	0.228598	0.143717		0.683749
	S.D.	0.00954872	0.224031	0.0820697	0.302042	1.40254		2.21743	0.406354	0.0175148	0.127478	0.178367	0.0550656	0.427455	1.38835	2.45947	0.0591784	0.57827	0.188799	0.0123728	0.00391127	0.0194592	0.152062	0.0149417	0.0194731	0.00435203	1.30873	0.715209	0.379203	0.0261434	0.715209	0.379203	0.0261434	0.168921	0.0325309	5.93748	0.0373673		0.264417	0.029989	0.177509	0.412276	0.159925	0.043352	0.0365919	0.037056	0.105839		0.358104
Nov 2010	mean	0.114109	1.05031	0.303996	3.32006	7.54145		50.6659	4.90198	0.251953	3.82896	2.02213	1.37885	5.81738	10.3072	42.1602	0.845352	29.7145	1.58461	0.188389	0.0529066	0.388119	1.5163	0.116864	0.173594	0.183855	12.1217	4.50171	4.30808	1.20648	4.50171	4.30808	1.20648	0.497946	0.135145	10.6443	0.0767442		0.390544	0.274566	0.310831	0.130076	0.437756	0.351732	0.342485	0.228524	0.354604		0.587068
	S.D.	0.0196963	0.254727	0.0889531	2.75657	2.41181		24.8354	1.54087	0.0225616	0.438134	0.525941	0.265925	1.50063	1.20706	10.359	0	7.13284	0.454135	0.0457621	0.00450916	0.187316	0.51495	0.00352284	0.00388147	0.098728	3.47276	1.37389	0.679182	0.282082	1.37389	0.679182	0.282082	0.0216009	0.0331315	7.54148	0.055006		0.0359966	0.00832488	0.0759462	0.0600496	0.0322747	0.00836082	0.0106009	0.1617	0.0123621		0.0491172
Jan 2011	mean	0.0633515	0.478369	0.0929242	11.0385	3.55726		46.421	3.28504	0.128893	1.66538	0.925453	0.663118	3.99222	4.52351	28.6864	0.632783	5.44408	1.82607	0.128557	0.0239427	0.253894	1.22906	0.0642473	0.0977683	0.17147	8.29321	2.23929	2.73211	0.85307	2.23929	2.73211	0.85307	0.283364	0.108875	3.97207	0.0230603		0.244014	0.15109	0.15893	0.0849055	0.282062	0.198886	0.186888	0.190149	0.194552		1.60616
	S.D.	0.00212674	0.0412063	0.0615064	14.218	0.900649		22.073	1.32984	0.0128698	0.21316	0.189031	0.0976694	1.24828	0.74474	4.20416	0.162293	0.659481	0.178505	0.0405835	0.00277268	0.114249	0.466926	0.00467062	0.0069786	0.081558	3.1975	0.23897	0.590693	0.0672164	0.23897	0.590693	0.0672164	0.0206297	0.0212709	5.61735	0.0326122		0.0363712	0.0109237	0.0476949	0.0477805	0.02976	0.0139967	0.0142918	0.0142479	0.0135292		0.455736
Mar 2011	mean	0.0798029	0.63519	0.0883729	9.75886	4.40101		54.1988	1.16214	0.145515	2.40628	1.17554	0.928544	4.87485	6.64825	33.418	0.717163	12.1323	1.7928	0.0912809	0.0319425	0.359676	1.52557	0.0608496	0.0926546	0.227665	10.6154	4.70591	2.55054	1.18353	4.70591	2.55054	1.18353	0.365166	0.0742405	0	0		0.290921	0.140787	0.146886	0.133669	0.299816	0.197414	0.175789	0.179688	0.0606915		1.3711
	S.D.	0.0065696	0.101173	0.0141565	2.89557	0.567898		8.12166	0.109623	0.00215181	0.106004	0.234052	0.139245	0.441363	1.62288	3.12409	0.0288017	0.127106	0.390531	0.00103161	0.00388825	0.0548318	0.296646	0.00149013	0.00111199	0.0250489	1.43663	0.192044	0.232927	0.0751118	0.192044	0.232927	0.0751118	0.066989	0.019721	0	0		0.0494421	0.00355547	0.0349656	0.0629094	0.06222	0.00939478	0.00421693	0.00404322	0.0858308		0.595689
Apr 2011	mean	0.115378	1.2821	0.210239	1.39356	4.85045		12.7621	4.20522	0.190817	1.67037	0.973335	0.552769	1.58342	11.2617	23.5952	0.439741	11.956	1.41045	0.106571	0.0509445	0.339845	0.900308	0.114318	0.170537	0.101471	5.94256	4.04857	3.01408	0.706089	4.04857	3.01408	0.706089	0.567759	0.0853257	15.6066	0.1181		1.12231	0.266816	0.430373	1.38237	1.17199	0.522497	0.333112	0.200606	0.346276		1.03578
	S.D.	0.0320219	0.275837	0.102418	0.527106	0.225679		2.30023	0.853883	0.0100666	0.303415	0.0957365	0.117414	0.166583	0.963268	4.2656	0.0492676	1.43068	0.0621747	0.0179676	0.00771784	0.102996	0.043648	0.0306024	0.0392501	0.0165956	1.65606	0.284376	1.33895	0.157909	0.284376	1.33895	0.157909	0.0703927	0.0288796	1.3946	0.0245966		0.57359	0.0721686	0.285679	0.955419	0.340026	0.132176	0.0894673	0.160014	0.0933529		0.498445
Fat body		Organic acids						Amino acids																												Polyamines			Free fatty acids										Sugars and polyols
Sampling date		Pyruvate	Succinate	Lactate	Glutarate	Citrate		Ala	Gly	ABU	Val	Leu	Ile	Thr	Ser	Pro	Glu	Gln	Arg	Asn	Asp	Met	Phe	Cys	Hcy	Orn	Lys	His	Tyr	Trp	His	Tyr	Trp	CTH	CC	Putrescine	Cadaverine		FA C16:0	FA C17:0	FA C18:0	FA C18:1n9	FA C18:2n6	FA C18:3n3	FA C19:0	FA C20:2n6	FA C20:3n6		Glycerol
Jul 2010	mean	0.497894	1.314	0.637063	0.502314	6.33309		3.26135	1.95081	0.499306	2.50394	0.955637	1.12817	4.14674	6.97222	14.2197	12.1121	13.131	1.07833	0.232167	0.285651	0.871467	1.54669	0.461594	0.657389	0.22462	1.37145	3.78678	8.34316	1.11703	3.78678	8.34316	1.11703	0.920643	0.475763	4.84229	0.40293		1.6427	1.07903	1.07968	0.79451	1.58318	1.39382	1.35217	1.37051	1.38888		2.93089
	S.D.	0.0761039	0.329327	0.0971319	0.0893837	0.695357		0.70098	0.367865	0.0242455	0.18439	0.272809	0.232527	0.618329	0.370901	1.21832	0.644611	3.7796	0.171691	0.0298261	0.0572385	0.277105	0.410279	0.0127942	0.0189535	0.0161097	0.257471	0.438676	2.91922	0.257676	0.438676	2.91922	0.257676	0.0575367	0.138957	0.684692	0.0207468		0.179798	0.0307972	0.201433	0.353164	0.147592	0.040957	0.0384153	0.0363758	0.040875		0.534159
Sep 2010	mean	0.370068	1.43112	0.913505	0.469296	6.12871		16.4762	3.18605	0.435169	4.8567	2.23293	2.24449	2.53572	16.0289	30.8393	12.5947	26.2723	1.50946	0.160869	0.578465	0.582922	1.91052	0.334725	0.471378	0.188246	4.35197	4.14381	7.04505	0.703777	4.14381	7.04505	0.703777	0.69046	0.482159	7.13719	0.358697		1.90694	0.781338	1.64088	1.87088	1.9046	1.10229	0.969263	0.993926	1.00856		3.49385
	S.D.	0.0394252	0.209584	0.357138	0.10856	0.197893		6.34142	0.958983	0.0417841	1.88834	1.41816	1.07729	1.24929	0.91051	3.02438	1.26917	2.23863	0.293089	0.014337	0.209145	0.20723	0.777704	0.0195976	0.0230141	0.0182312	1.19999	0.132021	2.20153	0.131408	0.132021	2.20153	0.131408	0.0946283	0.0989907	1.44125	0.0208076		0.699533	0.0490196	0.819025	1.27319	0.593597	0.0859309	0.049059	0.0460329	0.0488129		1.21119
Nov 2010	mean	0.369684	1.97426	0.782885	1.07138	6.79014		40.2518	4.87232	0.565283	15.0948	7.32515	6.60548	6.97905	12.404	44.7704	23.6967	37.5347	1.5696	0.164215	1.21634	1.07561	3.89913	0.380558	0.543817	0.327267	5.13607	11.0831	12.9932	1.36487	11.0831	12.9932	1.36487	0.818596	0.351973	6.81528	0.436455		1.07404	0.889511	0.680062	0.185639	1.3104	1.13613	1.11493	0.761934	0.794951		2.36072
	S.D.	0.0685017	0.566597	0.289489	0.544457	0.870866		2.3866	1.00722	0.00798599	2.03767	1.74762	1.28387	0.709646	1.21586	4.70112	3.05432	5.8859	0.233178	0.0189776	0.117436	0.129444	1.12857	0.028343	0.0404596	0.0594665	2.17535	0.76349	2.65916	0.14322	0.76349	2.65916	0.14322	0.0909395	0.284247	1.3891	0.0585452		0.0743743	0.0657321	0.147839	0.0922303	0.137186	0.0888312	0.0819734	0.545071	0.564185		0.146288
Jan 2011	mean	0.282583	0.608385	0.314052	3.55087	4.56926		119.255	8.77308	0.577211	18.157	11.1791	8.23668	9.32412	6.63733	43.6725	14.3896	9.48174	2.34127	0.27101	0.451482	2.88639	6.24614	0.307672	0.440332	0.295619	8.05916	11.0747	19.281	1.80467	11.0747	19.281	1.80467	0.594824	0.265603	9.94893	0.334078		0.927748	0.71654	0.592131	0.233808	1.08522	0.910149	0.897983	0.597971	0.601105		3.38512
	S.D.	0.0167095	0.00867458	0.0455348	0.115109	0.470693		20.2542	0.291588	0.0285315	3.16873	2.42299	2.05131	2.08353	0.999335	5.47115	4.37617	0.492342	0.0543908	0.0319932	0.156165	0.839367	1.65209	0.0153372	0.0204798	0.00553384	1.09662	0.768131	6.42653	0.291164	0.768131	6.42653	0.291164	0.0187899	0.0837395	2.5996	0.0437172		0.0660638	0.0333188	0.0614155	0.117414	0.0383356	0.0450083	0.0386433	0.424706	0.426132		1.05059
Mar 2011	mean	0.370859	1.03681	0.438539	3.27913	6.3225		112.722	2.83989	0.63257	20.5887	11.8527	9.61014	8.04349	8.70398	42.9382	18.109	17.7515	2.38766	0.163556	0.707494	3.32035	7.68026	0.375309	0.538594	0.306879	9.74554	14.718	13.8397	2.2351	14.718	13.8397	2.2351	0.848952	0.454199	10.5414	0.422643		1.01574	0.614367	0.615883	0.125162	1.28096	1.12041	1.09888	1.12073	1.13141		5.09902
	S.D.	0.0520127	0.168247	0.0536145	0.301722	1.12956		5.3328	0.463618	0.0302218	3.32286	2.80362	2.27541	0.704788	1.99649	5.79518	2.96664	1.66135	0.266527	0.0177893	0.13709	0.860074	1.49863	0.0381226	0.0558493	0.0241018	0.687213	5.17571	2.89526	0.0821649	5.17571	2.89526	0.0821649	0.156861	0.176976	1.11523	0.0248629		0.102693	0.440931	0.0873341	0.0925841	0.122717	0.0910815	0.112767	0.121633	0.117918		1.97299
Apr 2011	mean	0.523921	1.23491	0.768912	1.06216	4.77183		21.6878	6.56163	0.714001	6.97581	5.46366	2.9962	3.21429	17.2156	33.1352	15.5909	17.3754	3.54717	0.156663	0.711565	2.46416	6.23347	0.557065	0.798702	0.320902	7.03474	12.8652	29.7553	2.36512	12.8652	29.7553	2.36512	1.18307	0.473635	9.34755	0.45865		1.90492	1.30121	0.887926	1.36216	2.96581	1.9502	1.63295	1.16863	1.69738		3.59661
	S.D.	0.113371	0.223623	0.290738	0.415837	0.632817		5.9666	1.38036	0.0952537	2.89101	2.39126	1.4053	0.127423	3.30998	7.95298	3.14562	0.524441	0.430261	0.036099	0.317549	1.12115	1.55013	0.0527104	0.078946	0.0528956	2.04258	3.48971	5.6221	0.851308	3.48971	5.6221	0.851308	0.228091	0.0958209	3.06726	0.0330444		0.148954	0.124442	0.248179	0.729902	0.156944	0.0697586	0.157379	0.831314	0.14686		0.471424
Body wall		Organic acids						Amino acids																												Polyamines			Free fatty acids										Sugars and polyols
Sampling date		Pyruvate	Succinate	Lactate	Glutarate	Citrate		Ala	Gly	ABU	Val	Leu	Ile	Thr	Ser	Pro	Glu	Gln	Arg	Asn	Asp	Met	Phe	Cys	Hcy	Orn	Lys	His	Tyr	Trp	His	Tyr	Trp	CTH	CC	Putrescine	Cadaverine		FA C16:0	FA C17:0	FA C18:0	FA C18:1n9	FA C18:2n6	FA C18:3n3	FA C19:0	FA C20:2n6	FA C20:3n6		Glycerol
Jul 2010	mean	0.213275	0.720466	2.5123	0.100735	4.14196		8.30148	2.49636	0.265756	2.99585	1.19132	1.18339	5.18677	11.2003	16.7382	9.17196	22.1594	2.96278	0.565717	0.324916	1.92241	0.773074	0.212932	0.305544	0.137939	1.53248	5.84792	3.555	0.581815	5.84792	3.555	0.581815	0.499137	0.245869	4.48121	0.205482		1.32929	0.512057	1.34338	2.27908	1.21588	0.935018	0.628243	0	0.383875		1.72211
	S.D.	0.0147211	0.0391302	0.287652	0.00967799	0.451743		1.17974	0.383221	0.041539	0.22589	0.255817	0.210039	0.866371	1.27704	1.60656	0.581206	4.02317	0.198183	0.0752443	0.0994225	0.359592	0.184612	0.0298843	0.0441078	0.0192194	0.356114	1.07021	0.55734	0.10159	1.07021	0.55734	0.10159	0.145889	0.0580736	0.0435026	0.0288961		0.141181	0.077647	0.223912	0.147184	0.114905	0.0929796	0.0920343	0	0.271443		0.254122
Sep 2010	mean	0.200933	0.770937	2.77882	0.12342	3.62844		17.9397	3.28463	0.277053	3.21521	0.948148	1.11045	2.26504	17.1696	29.6039	12.8221	30.2117	3.05168	0.233881	0.461375	0.926882	0.702562	0.184432	0.263584	0.122674	3.10501	3.08612	2.812	0.333643	3.08612	2.812	0.333643	0.467098	0.105918	3.80753	0.214624		1.27699	0.436617	1.52169	2.23522	1.68885	0.697039	0.539687	0.552355	0.557874		2.06917
	S.D.	0.0158194	0.15131	0.297454	0.0280883	0.443907		2.0741	0.525427	0.0270171	0.245973	0.0881753	0.0998602	0.538094	1.6586	3.61065	1.17416	0.871827	0.409822	0.0240877	0.0652904	0.154767	0.108485	0.0115362	0.0182766	0.001509	0.399144	0.23059	0.203597	0.016974	0.23059	0.203597	0.016974	0.00479339	0.094858	0.50189	0.0199562		0.327085	0.0262882	0.532663	0.86787	0.557202	0.025147	0.0363524	0.0410579	0.0355112		0.572912
Nov 2010	mean	0.189812	0.694937	3.47378	0.174563	3.66467		41.4384	4.25311	0.306526	4.88359	1.87745	1.69645	5.67515	12.1326	43.7231	14.9319	42.8154	2.93202	0.243217	0.375458	1.25339	0.861769	0.170753	0.246665	0.144861	3.3092	3.89673	2.22094	0.486882	3.89673	2.22094	0.486882	0.470707	0.187551	4.25377	0.165936		0.602189	0.404183	0.557114	0.487776	0.744085	0.553791	0.503704	0.193256	0.160568		1.07659
	S.D.	0.028555	0.103901	0.361468	0.0102179	0.64279		4.81509	0.842259	0.0375543	0.686079	0.446104	0.362289	1.20207	1.71915	0.328314	1.51943	7.59502	0.268955	0.0378978	0.114938	0.162739	0.268194	0.0161394	0.0244014	0.0179781	1.30358	0.536951	0.545485	0.0396111	0.536951	0.545485	0.0396111	0.0641909	0.0163106	0.703182	0.0275494		0.0828568	0.0398122	0.127939	0.210754	0.0595054	0.0647047	0.0485136	0.273305	0.227077		0.185882
Jan 2011	mean	0.196908	0.34346	1.4191	0.819145	2.15165		83.4883	5.79685	0.309246	4.61818	2.77237	1.98833	6.37666	5.17567	32.2805	21.7708	7.16239	2.18096	0.170766	0.508564	1.19501	1.71377	0.166718	0.240723	0.178777	4.18846	3.5205	4.14681	0.607904	3.5205	4.14681	0.607904	0.413477	0.210761	3.80467	0.195262		0.617479	0.396235	0.478999	0.352433	0.728283	0.54272	0.491984	0.326808	0.506561		2.29409
	S.D.	0.0206039	0.0583807	0.0911247	0.0724391	0.0814868		15.7864	0.719949	0.00112695	0.552966	0.452048	0.41086	1.09938	1.02138	3.7185	1.74872	0.951156	0.181819	0.0231121	0.0595967	0.125109	0.45744	0.0083962	0.0125048	0.0216149	0.956903	0.429096	1.35596	0.0917093	0.429096	1.35596	0.0917093	0.0357562	0.0146079	0.144548	0.0222524		0.0666432	0.0156939	0.0729935	0.0989428	0.0437711	0.0275831	0.0249454	0.231427	0.0232359		0.819406
Mar 2011	mean	0.203648	0.429658	1.2997	0.923143	2.72938		87.2082	1.93054	0.306374	4.52789	2.23762	1.89441	6.17754	7.13313	34.9984	23.1416	16.797	2.70104	0.113694	0.641256	1.48899	1.32853	0.168651	0.243058	0.174022	4.68993	3.98671	2.19485	0.622828	3.98671	2.19485	0.622828	0.395836	0.167513	3.66478	0.173797		0.588781	0.399092	0.428994	0.263595	0.707025	0.551726	0.335499	0.344478	0.509306		1.98402
	S.D.	0.00403225	0.0334708	0.166055	0.11714	0.198823		9.73929	0.10463	0.00443577	0.659879	0.561209	0.451144	0.697169	1.84378	2.11465	2.23242	1.61745	0.341167	0.0211078	0.117906	0.290445	0.297457	0.00774376	0.0116727	0.00865313	0.78111	0.654839	0.571436	0.0867305	0.654839	0.571436	0.0867305	0.0539629	0.104773	0.348157	0.00674951		0.123179	0.0195212	0.211444	0.25871	0.151357	0.0490504	0.23837	0.244372	0.0270097		0.993775
Apr 2011	mean	0.212555	0.578818	3.27717	0.135047	3.11488		24.9479	6.63841	0.342182	3.10453	1.71259	1.14366	2.74961	16.1957	30.7797	10.7979	20.6587	3.20424	0.261645	0.400517	1.50136	1.11677	0.21298	0.311149	0.152302	3.21357	5.14906	0.860527	0.485909	5.14906	0.860527	0.485909	0.493901	0.207317	4.46117	0.278719		1.57815	0.507654	0.864011	2.99012	3.23587	1.31151	0.631841	0.651702	0.656602		2.17314
	S.D.	0.0141944	0.143812	0.233169	0.0254621	0.375399		2.99967	0.680468	0.0185101	0.718522	0.219418	0.327102	0.275018	1.67503	8.57743	1.74854	2.33776	0.126136	0.101074	0.0876608	0.410027	0.104041	0.00792749	0.0116022	0.01212	0.4449	0.353616	0.300714	0.071688	0.353616	0.300714	0.071688	0.0178207	0.0574093	0.410453	0.0138709		0.284828	0.0216344	0.287705	1.11072	1.3351	0.281092	0.0258695	0.0328967	0.0332784		0.365348
[truncated: 11 more columns]
